# Supplementary material for: Elastic Moduli of Avian Eggshell
Source: MDPI journal article supplement (doi:10.3390/biology10100989), 2021-09-30
Supplement: s1 [file s1]

# **Supplementary Material for Elastic moduli of avian eggshell**

Pei-Lin Chiang <sup>1,†</sup>, Yu-Chien Tseng <sup>1,†</sup>, Hsio-Jou Wu <sup>1,2</sup>, Shu-Han Tsao <sup>1</sup>, Shang-Ping Wu <sup>1</sup>, Wei-Cheng Wang <sup>3</sup>, Hsin-I Hsieh <sup>3</sup>, and Jia-Yang Juang <sup>1,\*</sup>

<sup>1</sup>Department of Mechanical Engineering, National Taiwan University, Taipei 10617, Taiwan

<sup>2</sup>Department of Life Science, National Taiwan University, Taipei 10617, Taiwan;

<sup>3</sup>Taipei Zoo, Taipei 11656, Taiwan

\* Correspondence: [jiayang@ntu.edu.tw](mailto:jiayang@ntu.edu.tw) (J.-Y. J.)

† These authors contributed equally to this work.

National Taiwan University

Taipei 10617, Taiwan

\*Corresponding author: [jiayang@ntu.edu.tw](mailto:jiayang@ntu.edu.tw)

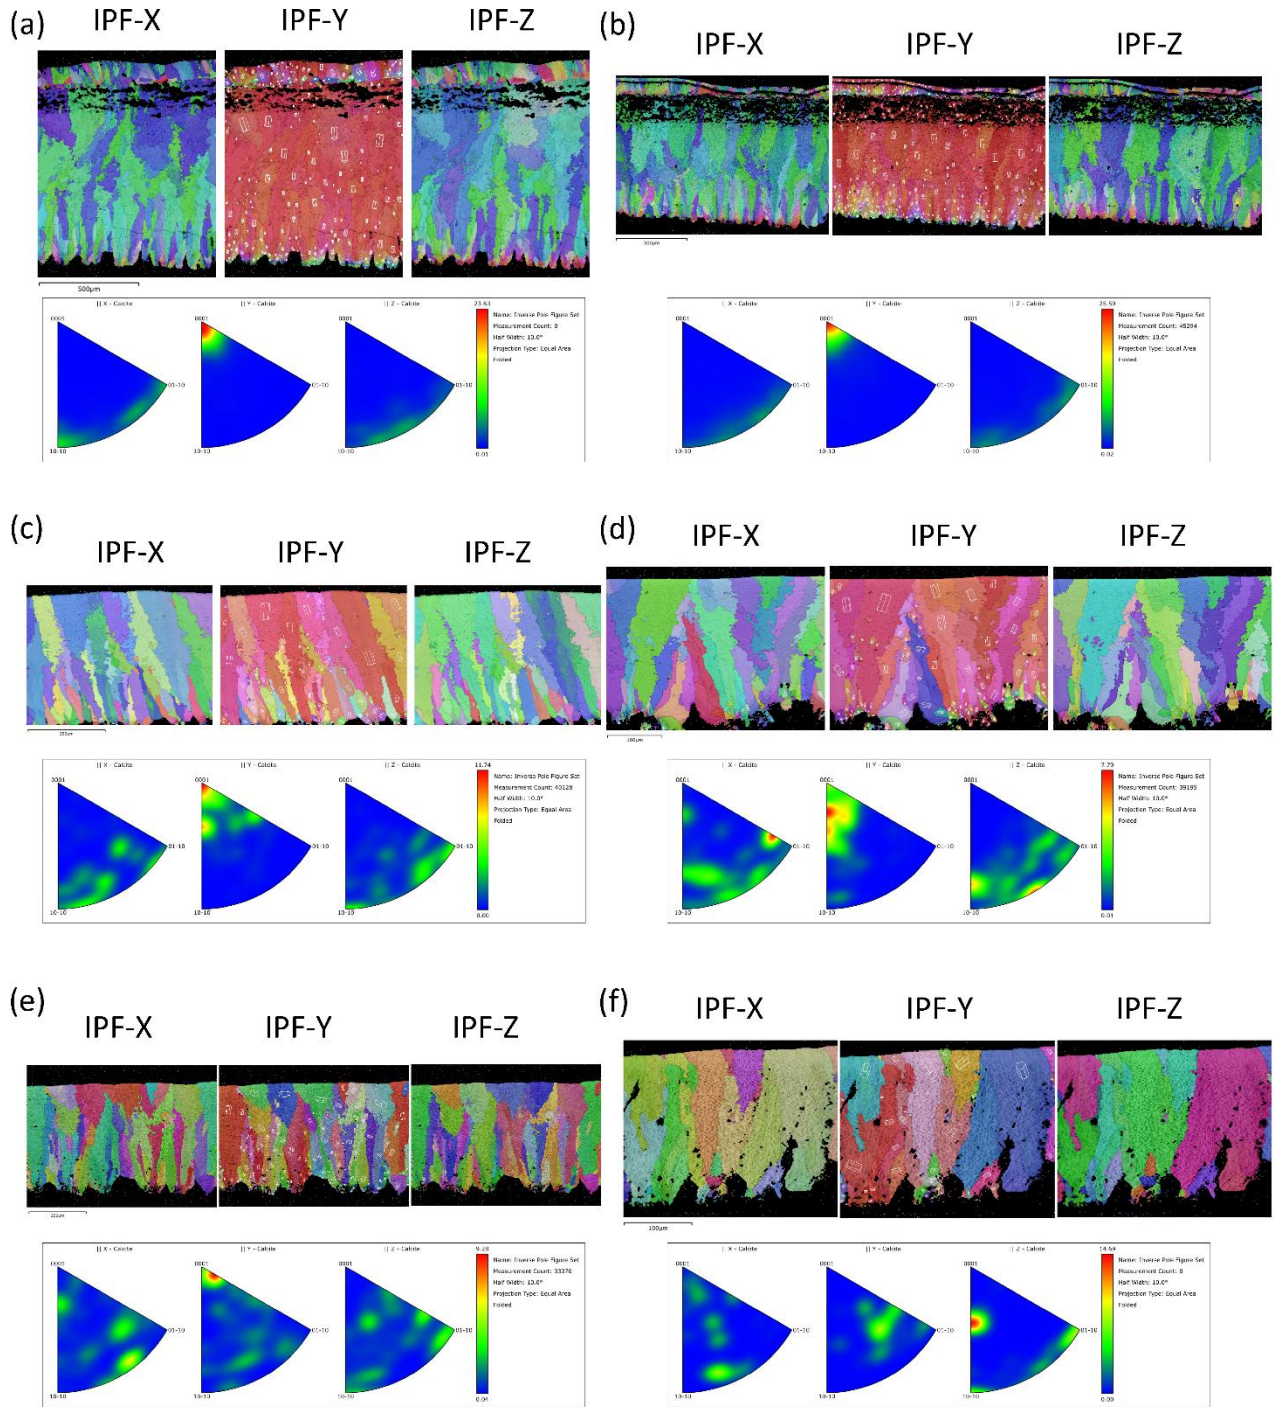

**Figure S1.** The IPF maps of avian eggshells obtained by EBSD. (a) Emu, (b) Cassowary, (c) Blue peacock, (d) Mallard, (e) Egyptian goose, and (f) Gray junglefowl.

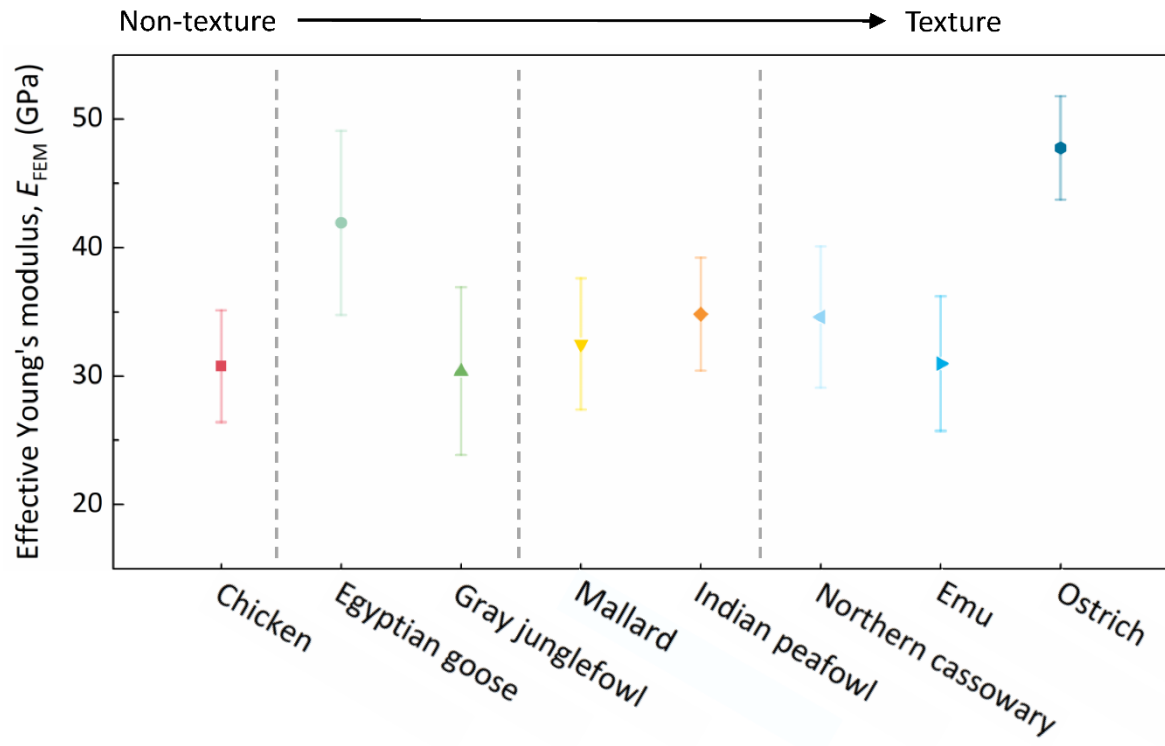

**Figure S2.** The effective Young's moduli versus crystallographic texture.
